# Supplementary material
Source: PubMed Central journal article supplement (PMC2667986)
Supplement: mmc1.pdf [file mmc1.pdf]

## Supplemental Data

### **Genome-wide Association and Follow-Up Replication Studies**

#### **Identified *ADAMTS18* and *TGFBR3* as Bone Mass**

#### **Candidate Genes in Different Ethnic Groups**

Dong-Hai Xiong, Xiao-Gang Liu, Yan-Fang Guo, Li-Jun Tan, Liang Wang, Bao-Yong Sha, Zi-Hui Tang, Feng Pan, Tie-Lin Yang, Xiang-Ding Chen, Shu-Feng Lei, Laura M. Yerges, Xue-Zen Zhu, Victor W. Wheeler, Alan L. Patrick, ClareAnn H. Bunker, Yan Guo, Han Yan, Yu-Fang Pei, Yin-Pin Zhang, Shawn Levy, Christopher J. Papasian, Peng Xiao, Y. Wang Lundberg, Robert R. Recker, Yao-Zhong Liu, Yong-Jun Liu, Joseph M. Zmuda, and Hong-Wen Deng

Figure S1. The LD Structure Covering *ADAMTS18* SNPs rs11859065, rs11864477, rs16945612 and rs11860781 in HapMap CEU Sample

R-squared ( $r^2$ ) value was used to denote LD status. Color scheme is:  $r^2 = 0$ : white;  $0 < r^2 < 1$ : shades of grey;  $r^2 = 1$ : black.

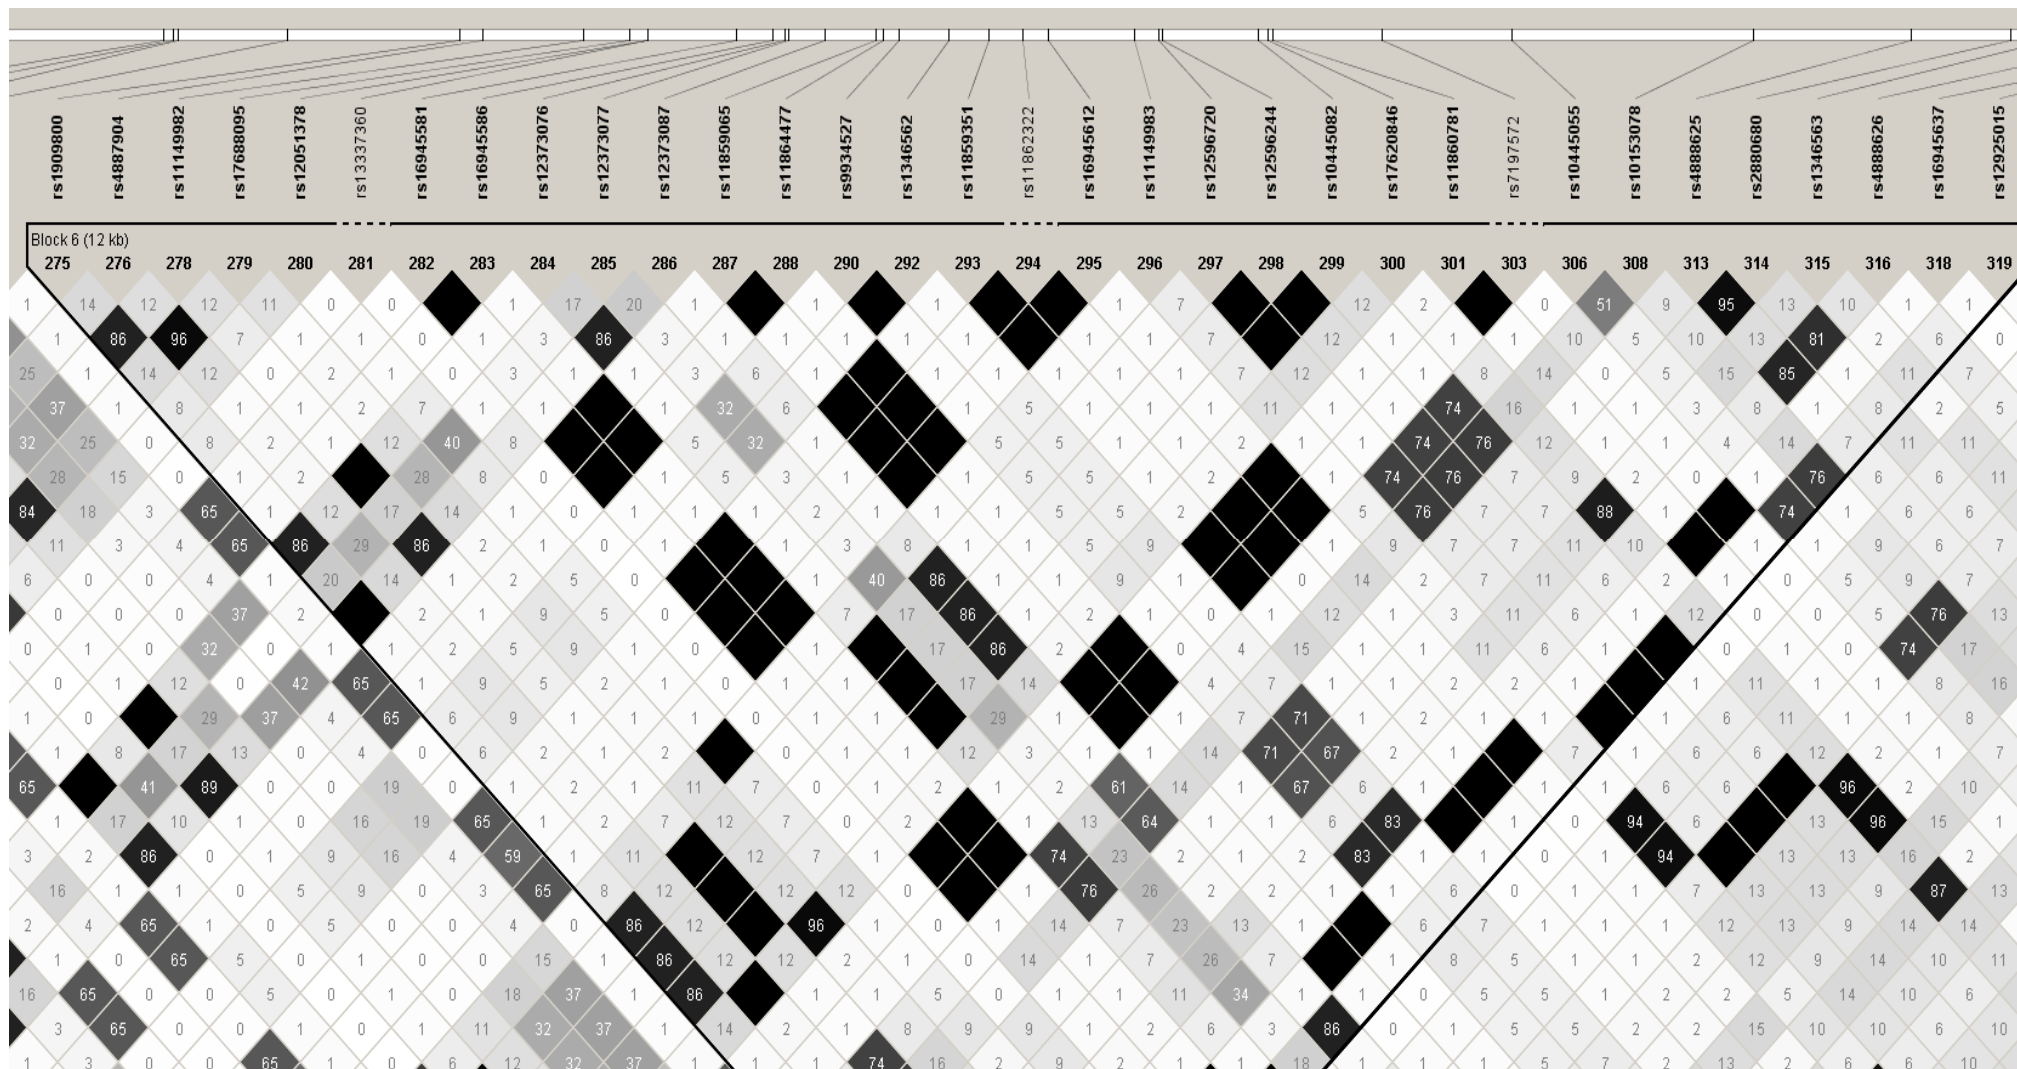



Figure S3. The LD Structure Covering *ADAMTS18* SNPs rs11859065, rs11864477, rs16945612 and rs11860781 in HapMap YRI Sample

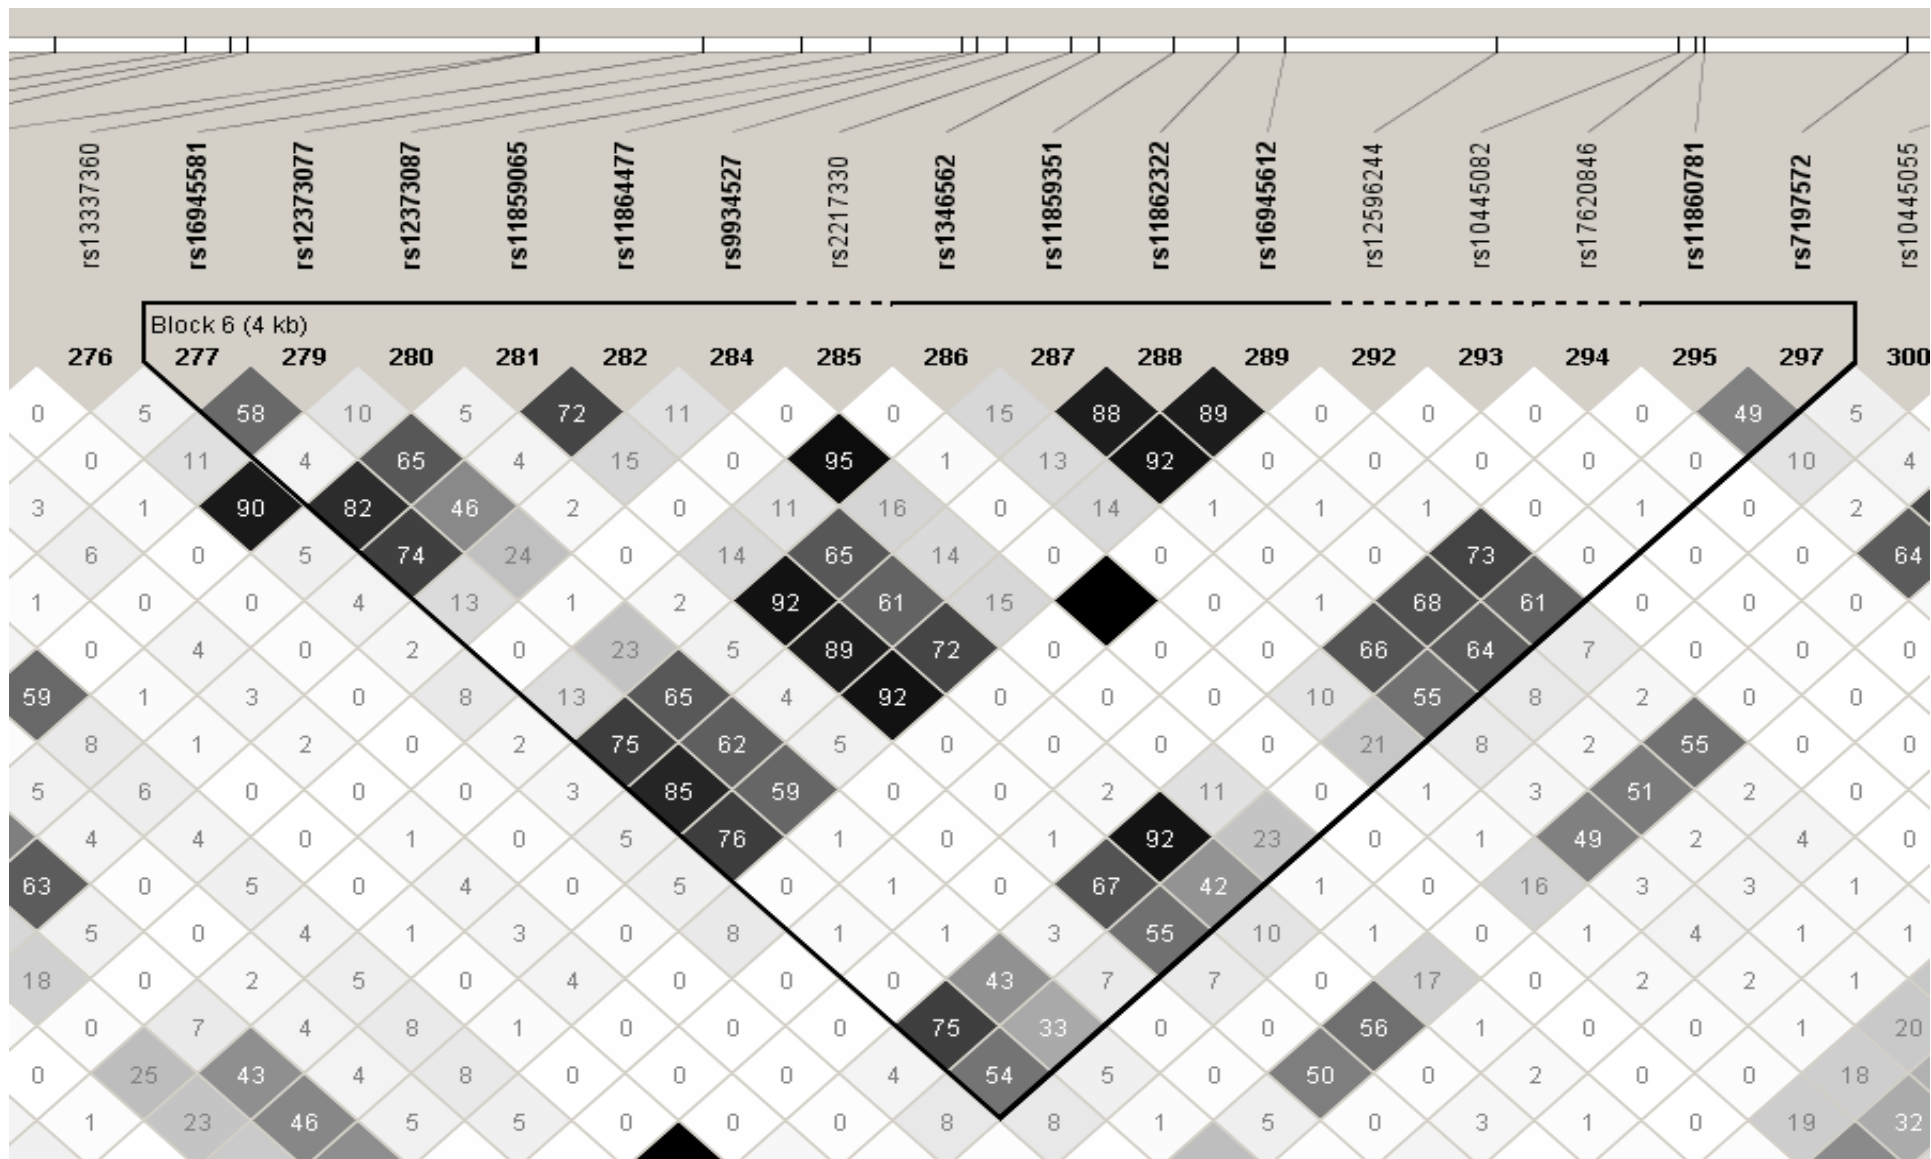

**Figure S4. NCBI GEO Profiles Showing Differentially Expressed *ADAMTS18* in Normal Fracture and Non-union Fracture Subjects**

**Title:** [GDS368](#) / 42200\_at / *ADAMTS18* / Homo sapiens

**Summary:** Identification of mechanisms leading to lack of skeletal repair in non-union fractures. Non-union fractures do not heal six months after injury and may cause advanced arthritis or loss of limb function. Normal and non-union callous bone samples examined.

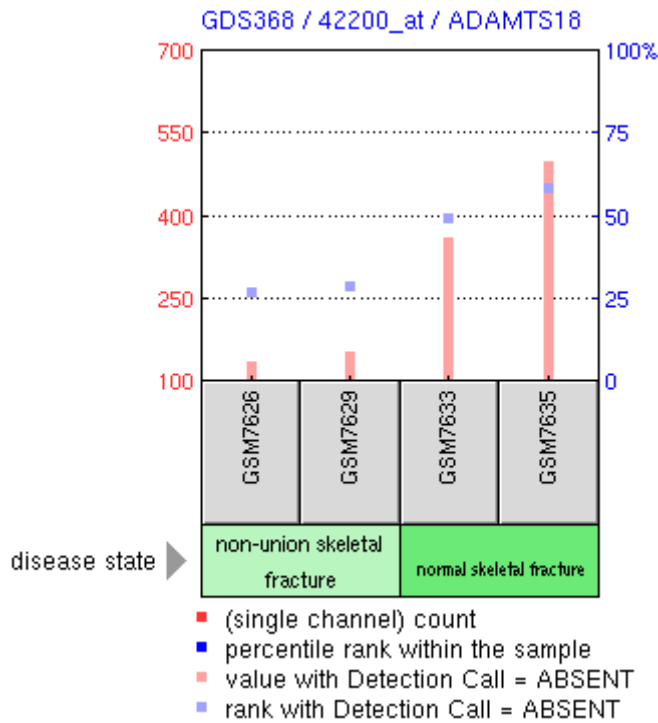

**Figure S5. NCBI GEO Profiles Showing Differentially Expressed *TGFBR3* in Normal Fracture and Non-union Fracture Subjects**

**Title:** [GDS367](#) / 1897\_at / *TGFBR3* / Homo sapiens

**Summary:** Identification of mechanisms leading to lack of skeletal repair in non-union fractures. Non-union fractures do not heal six months after injury and may cause advanced arthritis or loss of limb function. Normal and non-union callous bone samples examined.

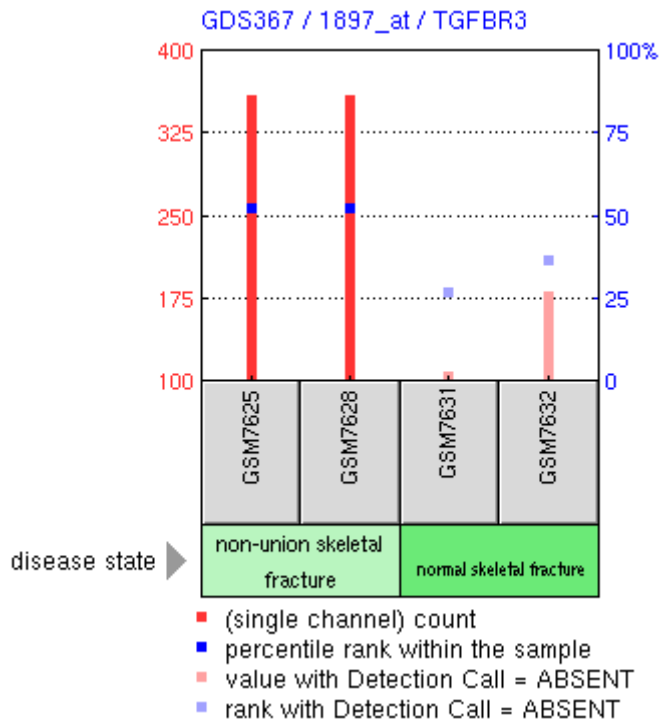

**Table S1. Information of the Analyzed ADAMTS18 SNPs and the p Values for Their Single-SNP and Sliding Window Association with Hip BMD in the Female Sample**

| SNP | Name       | Position | Role     | Allele <sup>a</sup> | MAF <sup>b</sup> | MAF <sup>c</sup> | P value <sup>d</sup> | P value <sup>e</sup> |
|-----|------------|----------|----------|---------------------|------------------|------------------|----------------------|----------------------|
| 1   | rs2343047  | 75867997 | 3' UTR   | C/A                 | 0.434            | 0.356            | 0.811                | 0.851                |
| 2   | rs17701900 | 75868793 | 3' UTR   | C/T                 | 0.137            | 0.186            | 0.490                | 0.830                |
| 3   | rs7202055  | 75868813 | 3' UTR   | T/C                 | 0.192            | 0.200            | 0.452                | 0.854                |
| 4   | rs17701924 | 75869296 | 3' UTR   | A/C                 | 0.204            | 0.186            | 0.923                | 0.355                |
| 5   | rs17712821 | 75870261 | 3' UTR   | G/T                 | 0.135            | 0.183            | 0.671                | 0.355                |
| 6   | rs12930139 | 75870453 | 3' UTR   | A/G                 | 0.135            | 0.183            | 0.699                | 0.355                |
| 7   | rs17712826 | 75871382 | 3' UTR   | T/C                 | 0.177            | 0.200            | 0.431                | 0.355                |
| 8   | rs17712844 | 75871485 | 3' UTR   | C/G                 | 0.135            | 0.183            | 0.613                | 0.355                |
| 9   | rs12918088 | 75872617 | 3' UTR   | T/C                 | 0.135            | 0.175            | 0.553                | 0.028                |
| 10  | rs16945428 | 75873761 | 3' UTR   | T/C                 | 0.109            | 0.161            | 0.158                | 0.028                |
| 11  | rs889705   | 75874898 | Exon23   | G/C                 | 0.153            | 0.183            | 0.914                | 0.493                |
| 12  | rs889706   | 75875092 | Exon23   | C/T                 | 0.158            | 0.183            | 0.520                | 0.393                |
| 13  | rs1820253  | 75876072 | Intron22 | C/T                 | 0.261            | 0.385            | 0.527                | 0.461                |
| 14  | rs12925274 | 75878016 | Intron22 | G/T                 | 0.109            | 0.167            | 0.138                | 0.461                |
| 15  | rs4888617  | 75878059 | Intron22 | T/C                 | 0.012            | 0.008            | 0.627                | 0.096                |
| 16  | rs4887902  | 75879447 | Intron22 | C/A                 | 0.010            | 0.018            | 0.524                | 0.180                |
| 17  | rs17769706 | 75879810 | Intron22 | C/T                 | 0.040            | 0.033            | 0.186                | 0.274                |
| 18  | rs17769712 | 75880000 | Intron22 | G/A                 | 0.109            | 0.169            | 0.136                | 0.534                |
| 19  | rs11643318 | 75880258 | Intron22 | G/C                 | 0.445            | 0.483            | 0.407                | 0.591                |
| 20  | rs3743749  | 75880736 | exon22   | C/G                 | 0.158            | 0.192            | 0.265                | 0.734                |
| 21  | rs17769754 | 75885362 | Intron17 | T/A                 | 0.122            | 0.167            | 0.244                | 0.905                |
| 22  | rs1025315  | 75893430 | Intron17 | A/G                 | 0.039            | 0.033            | 0.196                | 0.141                |
| 23  | rs17769870 | 75893980 | Intron17 | T/C                 | 0.113            | 0.158            | 0.123                | 0.083                |
| 24  | rs8053462  | 75897582 | Intron17 | C/T                 | 0.078            | 0.050            | 0.611                | 0.734                |
| 25  | rs16945498 | 75902690 | Intron17 | T/G                 | 0.013            | 0.000            | 0.208                | 0.555                |
| 26  | rs2650911  | 75903148 | Intron17 | A/G                 | 0.481            | 0.375            | 0.090                | 0.141                |
| 27  | rs17770036 | 75903185 | Intron17 | C/T                 | 0.253            | 0.150            | 0.075                | 0.577                |
| 28  | rs965382   | 75903352 | Intron17 | C/T                 | 0.217            | 0.225            | 0.744                | 0.171                |
| 29  | rs1428842  | 75903575 | Intron17 | T/C                 | 0.011            | 0.000            | 0.221                | 0.201                |
| 30  | rs11640996 | 75903589 | Intron17 | G/C                 | 0.237            | 0.150            | 0.053                | 0.202                |
| 31  | rs2562122  | 75905043 | Intron17 | C/T                 | 0.134            | 0.087            | 0.971                | 0.682                |
| 32  | rs2562125  | 75907154 | Intron17 | C/T                 | 0.493            | 0.397            | 0.029                | 0.156                |
| 33  | rs9746086  | 75907584 | Intron17 | T/A                 | 0.409            | 0.352            | 0.019                | 0.201                |
| 34  | rs9746317  | 75912063 | Intron15 | A/G                 | 0.138            | 0.167            | 0.661                | 0.682                |
| 35  | rs274520   | 75912792 | Intron14 | A/G                 | 0.075            | 0.042            | 0.680                | 0.156                |
| 36  | rs8044883  | 75915465 | Intron13 | T/C                 | 0.437            | 0.367            | 0.039                | 0.156                |
| 37  | rs8059032  | 75915970 | Intron13 | A/G                 | 0.440            | 0.367            | 0.049                | 0.156                |
| 38  | rs8061205  | 75916480 | Intron13 | A/C                 | 0.439            | 0.367            | 0.041                | 0.156                |
| 39  | rs1428848  | 75919039 | Intron12 | T/C                 | 0.421            | 0.367            | 0.053                | 0.505                |
| 40  | rs891132   | 75919517 | Intron12 | C/G                 | 0.359            | 0.225            | 0.002                | 0.505                |
| 41  | rs6564427  | 75924089 | Intron12 | G/A                 | 0.286            | 0.175            | 0.015                | 0.505                |
| 42  | rs2650891  | 75924161 | Intron12 | C/A                 | 0.495            | 0.300            | 0.007                | 0.505                |
| 43  | rs11149981 | 75927639 | Intron11 | A/C                 | 0.096            | 0.158            | 0.291                | 0.505                |
| 44  | rs6564429  | 75930540 | Intron11 | A/G                 | 0.126            | 0.075            | 0.885                | 0.544                |
| 45  | rs8049128  | 75930624 | Intron11 | A/G                 | 0.413            | 0.254            | 0.004                | 0.544                |

|                       |                   |                 |                |            |              |              |                             |                             |
|-----------------------|-------------------|-----------------|----------------|------------|--------------|--------------|-----------------------------|-----------------------------|
| 46                    | rs6564430         | 75930688        | Intron11       | T/C        | 0.416        | 0.267        | 0.006                       | 0.544                       |
| 47                    | rs6564431         | 75930762        | Intron11       | T/C        | 0.391        | 0.258        | 0.005                       | 0.345                       |
| 48                    | rs1428836         | 75942716        | Intron10       | C/T        | 0.461        | 0.383        | 0.051                       | 0.108                       |
| 49                    | rs1428837         | 75943019        | Intron10       | T/A        | 0.023        | 0.010        | 0.567                       | 0.090                       |
| 50                    | rs10514416        | 75947951        | Intron8        | A/C        | 0.436        | 0.467        | 0.346                       | 0.117                       |
| 51                    | rs8044972         | 75957583        | Intron4        | T/C        | 0.233        | 0.158        | 0.255                       | 2.90×10 <sup>-5</sup>       |
| 52                    | rs274540          | 75978552        | Intron3        | T/C        | 0.089        | 0.033        | 0.004                       | 4.61×10 <sup>-4</sup>       |
| 53                    | rs17620748        | 75978837        | Intron3        | C/G        | 0.216        | 0.237        | 0.617                       | 0.117                       |
| 54                    | rs11859065        | 75985216        | Intron3        | A/G        | 0.118        | 0.104        | 1.28×10 <sup>-6</sup>       | 4.91×10 <sup>-4</sup>       |
| <b>55<sup>f</sup></b> | <b>rs11864477</b> | <b>75985270</b> | <b>Intron3</b> | <b>C/T</b> | <b>0.117</b> | <b>0.104</b> | <b>4.17×10<sup>-7</sup></b> | <b>2.90×10<sup>-5</sup></b> |
| 56                    | rs16945612        | 75986473        | Intron3        | C/T        | 0.117        | 0.109        | 5.75×10 <sup>-7</sup>       | 4.61×10 <sup>-4</sup>       |
| 57                    | rs12596244        | 75987305        | Intron3        | G/A        | 0.172        | 0.217        | 0.043                       | 4.12×10 <sup>-4</sup>       |
| 58                    | rs11860781        | 75988112        | Intron3        | T/A        | 0.120        | 0.104        | 2.03×10 <sup>-6</sup>       | 5.78×10 <sup>-4</sup>       |
| 59                    | rs4888626         | 75994422        | Intron3        | A/G        | 0.247        | 0.183        | 0.567                       | 0.012                       |
| 60                    | rs10781983        | 75998680        | Intron3        | G/A        | 0.412        | 0.275        | 0.010                       | 0.073                       |
| 61                    | rs8053681         | 76000669        | Intron3        | T/C        | 0.396        | 0.258        | 8.44×10 <sup>-4</sup>       | 0.082                       |
| 62                    | rs11647255        | 76000954        | Intron3        | G/A        | 0.389        | 0.254        | 0.002                       | 0.307                       |
| 63                    | rs12446196        | 76002373        | Intron3        | T/A        | 0.156        | 0.233        | 0.039                       | 0.312                       |
| 64                    | rs17621104        | 76005589        | Intron3        | A/C        | 0.125        | 0.142        | 0.214                       | 0.312                       |
| 65                    | rs17621123        | 76006164        | Intron3        | G/A        | 0.233        | 0.208        | 0.090                       | 0.080                       |
| 66                    | rs8051254         | 76006457        | Intron3        | G/A        | 0.346        | 0.233        | 0.036                       | 0.105                       |
| 67                    | rs1428840         | 76006933        | Intron3        | C/T        | 0.318        | 0.299        | 0.029                       | 0.089                       |
| 68                    | rs11640978        | 76008941        | Intron3        | C/G        | 0.182        | 0.242        | 0.891                       | 0.117                       |
| 69                    | rs11149989        | 76008984        | Intron3        | A/G        | 0.328        | 0.208        | 0.013                       | 0.080                       |
| 70                    | rs17688488        | 76009622        | Intron3        | C/G        | 0.122        | 0.108        | 0.784                       | 0.105                       |
| 71                    | rs10781985        | 76009711        | Intron3        | G/A        | 0.326        | 0.212        | 0.007                       | 0.089                       |
| 72                    | rs10781986        | 76009728        | Intron3        | A/G        | 0.328        | 0.217        | 0.016                       | 0.089                       |
| 73                    | rs12934271        | 76011693        | Intron3        | G/A        | 0.327        | 0.217        | 0.009                       | 0.063                       |
| 74                    | rs12934409        | 76011737        | Intron3        | G/A        | 0.330        | 0.217        | 0.009                       | 0.093                       |
| 75                    | rs768503          | 76012089        | Intron3        | A/C        | 0.114        | 0.108        | 0.993                       | 0.223                       |
| 76                    | rs919376          | 76012822        | Intron3        | A/G        | 0.318        | 0.217        | 0.004                       | 0.402                       |
| 77                    | rs17688543        | 76013222        | Intron3        | C/T        | 0.201        | 0.242        | 0.656                       | 0.784                       |
| 78                    | rs1366548         | 76014290        | Intron3        | C/T        | 0.340        | 0.233        | 0.027                       | 0.512                       |
| 79                    | rs1366547         | 76019882        | Intron3        | T/G        | 0.497        | 0.408        | 0.030                       | 0.264                       |
| 80                    | rs1428849         | 76020099        | Intron3        | C/A        | 0.086        | 0.125        | 0.771                       | 0.075                       |
| 81                    | rs4888631         | 76027875        | Promoter       | C/G        | 0.364        | 0.242        | 0.010                       | 0.012                       |
| 82                    | rs1317683         | 76032948        | Promoter       | G/A        | 0.269        | 0.283        | 0.386                       | 0.017                       |

- a. The former allele represents the minor allele of each locus.  
b. Minor allele frequency calculated in our own white sample.  
c. Minor allele frequency reported for whites in the public database such as HapMap or dbSNP.  
d. P values for associations using single-SNP marker test.  
e. P values for associations using size 5 haplotype sliding window test.  
f. SNP–rs11864477 that is most significant for hip BMD is labeled in bold.



**Table S2. Information of the Analyzed *TGFBR3* SNPs and the p Values for Their Single-SNP and Sliding Window Association with Spine BMD in the Total Sample**

| SNP                   | Name              | Position        | Role           | Allele <sup>a</sup> | MAF <sup>b</sup> | MAF <sup>c</sup> | P value <sup>d</sup>        | P value <sup>e</sup>        |
|-----------------------|-------------------|-----------------|----------------|---------------------|------------------|------------------|-----------------------------|-----------------------------|
| 1                     | rs1555890         | 91933474        | Intron17       | G/A                 | 0.106            | 0.125            | 0.192                       | 0.160                       |
| 2                     | rs1555889         | 91933529        | Intron17       | A/G                 | 0.111            | 0.125            | 0.224                       | 0.460                       |
| 3                     | rs1555887         | 91933545        | Intron17       | C/T                 | 0.264            | 0.208            | 0.748                       | 0.322                       |
| 4                     | rs3754014         | 91944008        | Intron15       | T/A                 | 0.227            | 0.200            | 0.424                       | 0.438                       |
| 5                     | rs6660484         | 91945196        | Intron15       | G/A                 | 0.437            | 0.460            | 0.846                       | 0.749                       |
| 6                     | rs3767569         | 91945959        | Intron15       | A/G                 | 0.163            | 0.142            | 0.389                       | 0.713                       |
| 7                     | rs17512269        | 91949650        | Intron14       | T/C                 | 0.218            | 0.258            | 0.816                       | 0.239                       |
| 8                     | rs10782997        | 91949982        | Intron14       | A/T                 | 0.446            | 0.483            | 0.404                       | 0.471                       |
| 9                     | rs1805113         | 91950526        | exon14         | T/C                 | 0.445            | 0.492            | 0.510                       | 0.418                       |
| 10                    | rs11165313        | 91952036        | Intron13       | G/C                 | 0.095            | 0.267            | 0.136                       | 0.418                       |
| 11                    | rs10157635        | 91960481        | Intron8        | T/C                 | 0.059            | 0.017            | 0.009                       | 0.627                       |
| 12                    | rs1542703         | 91961359        | Intron8        | G/C                 | 0.280            | 0.200            | 0.259                       | 0.206                       |
| 13                    | rs17131541        | 91964397        | Intron8        | T/G                 | 0.057            | 0.017            | 0.011                       | 0.154                       |
| 14                    | rs10874909        | 91964971        | Intron8        | G/A                 | 0.057            | 0.017            | 0.008                       | 0.154                       |
| 15                    | rs11466581        | 91968641        | Intron6        | A/G                 | 0.436            | 0.500            | 0.918                       | 0.217                       |
| 16                    | rs6677523         | 91975055        | Intron5        | G/A                 | 0.112            | 0.167            | 0.640                       | 0.217                       |
| 17                    | rs2087299         | 91976391        | Intron5        | T/C                 | 0.443            | 0.483            | 0.858                       | 0.498                       |
| 18                    | rs17131544        | 91977675        | Intron5        | C/T                 | 0.112            | 0.167            | 0.653                       | 0.498                       |
| 19                    | rs4658112         | 91981254        | Intron5        | T/C                 | 0.328            | 0.317            | 0.606                       | 0.148                       |
| 20                    | rs12403389        | 91981352        | Intron5        | C/G                 | 0.335            | 0.358            | 0.251                       | 9.63×10 <sup>-6</sup>       |
| <b>21<sup>f</sup></b> | <b>rs17131547</b> | <b>91983608</b> | <b>Intron5</b> | <b>A/G</b>          | <b>0.013</b>     | <b>0.021</b>     | <b>3.91×10<sup>-4</sup></b> | <b>3.47×10<sup>-8</sup></b> |
| 22                    | rs17573483        | 91990833        | Intron5        | A/G                 | 0.161            | 0.183            | 0.701                       | 0.281                       |
| 23                    | rs7526590         | 91994042        | Intron5        | T/A                 | 0.180            | 0.167            | 0.133                       | 0.063                       |
| 24                    | rs284174          | 91994196        | Intron5        | G/T                 | 0.418            | 0.392            | 0.089                       | 0.055                       |
| 25                    | rs12133753        | 91994677        | Intron5        | T/C                 | 0.181            | 0.167            | 0.222                       | 0.029                       |
| 26                    | rs284175          | 91994863        | Intron5        | G/A                 | 0.421            | 0.392            | 0.171                       | 0.662                       |
| 27                    | rs284180          | 92000436        | Intron4        | C/A                 | 0.428            | 0.400            | 0.271                       | 0.645                       |
| 28                    | rs17131554        | 92000796        | Intron4        | G/A                 | 0.142            | 0.127            | 0.551                       | 0.063                       |
| 29                    | rs1473488         | 92014334        | Intron4        | C/T                 | 0.470            | 0.483            | 0.052                       | 0.225                       |
| 30                    | rs12751910        | 92015895        | Intron4        | A/G                 | 0.316            | 0.283            | 0.956                       | 0.501                       |
| 31                    | rs17443164        | 92018636        | Intron4        | G/C                 | 0.316            | 0.288            | 0.906                       | 0.891                       |
| 32                    | rs12756024        | 92021028        | Intron4        | A/C                 | 0.467            | 0.483            | 0.060                       | 0.891                       |
| 33                    | rs284142          | 92029214        | Intron4        | C/T                 | 0.356            | 0.342            | 0.388                       | 0.891                       |
| 34                    | rs1192529         | 92029248        | Intron4        | A/G                 | 0.355            | 0.333            | 0.352                       | 0.429                       |
| 35                    | rs1192528         | 92029668        | Intron4        | G/C                 | 0.354            | 0.333            | 0.393                       | 0.429                       |
| 36                    | rs284164          | 92041655        | Intron3        | A/G                 | 0.104            | 0.092            | 0.724                       | 0.429                       |
| 37                    | rs284160          | 92042658        | Intron3        | A/G                 | 0.107            | 0.093            | 0.716                       | 0.429                       |
| 38                    | rs10493859        | 92046232        | Intron3        | T/G                 | 0.324            | 0.267            | 0.884                       | 0.802                       |
| 39                    | rs284148          | 92050431        | Intron3        | A/G                 | 0.105            | 0.085            | 0.815                       | 0.802                       |
| 40                    | rs10493858        | 92060525        | Intron3        | C/G                 | 0.221            | 0.325            | 0.249                       | 0.802                       |
| 41                    | rs901913          | 92065750        | Intron3        | A/C                 | 0.106            | 0.092            | 0.722                       | 0.802                       |
| 42                    | rs2810884         | 92066921        | Intron3        | A/G                 | 0.326            | 0.267            | 0.872                       | 0.802                       |
| 43                    | rs12726500        | 92068810        | Intron3        | C/A                 | 0.348            | 0.305            | 0.431                       | 0.420                       |
| 44                    | rs2489186         | 92069643        | Intron3        | A/G                 | 0.104            | 0.092            | 0.740                       | 0.420                       |

*AJHG*, Volume 84

|    |            |          |         |     |       |       |       |       |
|----|------------|----------|---------|-----|-------|-------|-------|-------|
| 45 | rs11590254 | 92089161 | Intron3 | T/A | 0.312 | 0.300 | 0.193 | 0.852 |
| 46 | rs2799524  | 92089900 | Intron3 | T/C | 0.098 | 0.092 | 0.581 | 0.857 |
| 47 | rs2634030  | 92090479 | Intron3 | G/A | 0.097 | 0.100 | 0.617 | 0.755 |
| 48 | rs17516329 | 92092369 | Intron3 | T/A | 0.310 | 0.100 | 0.151 | 0.533 |
| 49 | rs2634028  | 92093441 | Intron3 | A/C | 0.090 | 0.092 | 0.866 | 0.174 |
| 50 | rs11576557 | 92096397 | Intron3 | T/C | 0.122 | 0.127 | 0.444 | 0.460 |
| 51 | rs1805110  | 92099633 | exon3   | T/C | 0.098 | 0.012 | 0.613 | 0.379 |
| 52 | rs2489189  | 92104324 | Intron2 | T/A | 0.069 | 0.092 | 0.984 | 0.566 |
| 53 | rs12569180 | 92105007 | Intron2 | C/G | 0.309 | 0.308 | 0.069 | 0.471 |
| 54 | rs10493856 | 92107337 | Intron2 | G/A | 0.406 | 0.442 | 0.041 | 0.361 |
| 55 | rs9661103  | 92108494 | Intron2 | T/C | 0.316 | 0.308 | 0.119 | 0.685 |

a–e has the same meaning as Appendix Table 1.

f. SNP–rs17131547 that is most significant for spine BMD is labeled in bold.
